# Supplementary material for: Multiplexed PCR-Free Detection of MicroRNAs in Single Cancer Cells Using a DNA-Barcoded Microtrough Array Chip
Source: PubMed Central journal article supplement (PMC6523668; doi:10.3390/mi10040215), 2019-03-27
Supplement: micromachines-10-00215-s001.pdf [file micromachines-10-00215-s001.pdf]

# Supplementary Materials

## Multiplexed PCR-Free Detection of MicroRNAs in Single Cancer Cells Using a DNA-Barcoded Microtrough Array Chip

Nayi Wang<sup>1</sup>, Yao Lu<sup>1</sup>, Zhuo Chen<sup>1</sup> and Rong Fan<sup>1,2,3,4,\*</sup>

<sup>1</sup> Department of Biomedical Engineering, Yale University, New Haven, CT 06520, USA; wangnayi@gmail.com (N.W.); luyao@dicp.ac.cn (Y.L.); zhuo.chen@yale.edu (Z.C.)

<sup>2</sup> Yale Cancer Center, Yale University School of Medicine, New Haven, CT 06520, USA

<sup>3</sup> Yale Stem Cell Center, Yale University School of Medicine, New Haven, CT 06520, USA.

<sup>4</sup> Human and Translational Immunology Program, Yale University School of Medicine, New Haven, CT 06520, USA

\* Correspondence: rong.fan@yale.edu

Received: 8 March 2019; Accepted: 25 March 2019; Published: 27 March 2019

### Table S1: Sequence design of 13 microRNA capture/reporter DNA oligomers

#### 1. hsa-miR-146a MI0000477: A'

5' biotin- AAA AAA AAA AAA ATA CGG ACT TAG CTC CAG GAT AAA AAA – PC Linker – AAA AAA GAT ATA TTT TAA ACC CAT GGA ATT CAG TTC TCA /3InvdT/

#### 2. hsa-miR-145 MI0000461: B'

5' biotin AAA AAA AAA AAA ATA GGC ATG ATT CAA TGA GGC AAA AAA – PC Linker – AAA AAA GAT ATA TTT TAA GGG ATT CCT GGG AAA ACT GGA C/3InvdT/

#### 3. hsa-miR-21 MI0000077: C'

5' biotin- AAA AAA AAA AAA GCG ATA GTA GAC GAG TGC AAA AAA – PC Linker – AAA AAA GAT ATA TTT TAT CAA CAT CAG TCT GAT AAG CTA/3InvdT/

#### 4. hsa-miR-16-5p D'

5' biotin AAA AAA AAA AAA ATA CTC TGA CAT CTC GAC CAT AAA AAA – PC Linker – AAA AAA CGCCAATATTTACGTGCTGCTA /3InvdT/

#### 5. hsa-miR-150-5p E'

5' biotin AAA AAA AAA AAA ATA GAT ACT GCC ACT TCA CAT AAA AAA – PC Linker – AAA AAA ACTGGTACAAGGGTTGGGAGA /3InvdT/

#### 6. hsa-miR-142-3p F'

5' *biotin* AAA AAA AAA AAA ATA CCG TGA ACC TTA CCT GAT AAA AAA – PC Linker  
– AAA AAA TCCATAAAGTAGGAAACACTACA /3InvdT/

**7. hsa-miR-155-5p G'**

5' *biotin* AAA AAA AAA AAA TGC TCG GGA AGG CTA CTC AAA AAA – PC Linker –  
AAA AAA CCTATCACGATTAGCATT /3InvdT/

**8. hsa-miR-223-3p H'**

5' *biotin* AAA AAA AAA AAA ACG CAC CGC AGT TTG GTC AAT AAA AAA – PC Linker  
– AAA AAA TGGGGTATTTGACAAACTGACA /3InvdT/

**9. hsa-miR-424-5p I'**

5' *biotin* AAA AAA AAA AAA ATC CGA CGC AAC AAT AGG GCA AAA AAA – PC  
Linker – AAA AAA TTCAAACATGAATTGCTGCT /3InvdT/

**10. hsa-miR-28-5p J'**

5' *biotin* AAA AAA AAA AAA ACC TGC TCG ACA ACT AGA AGA AAA AAA – PC  
Linker – AAA AAA TCA ATA GAC TGT GAG CTC CT /3InvdT/

**11. hsa-miR-122-5p K'**

5' *biotin* AAA AAA AAA AAA ACC GCG ACC AGA ATT AGA TTA AAA AAA – PC Linker  
– AAA AAA AAACACCATTGTCACACTCCA/3InvdT/

**12. hsa-miR-221-3p L'**

5' *biotin* AAA AAA AAA AAA AGC CGA AGC AGA CTT AAT CAC AAA AAA – PC  
Linker – AAA AAA GAT ATA TTT TAG AAA CCC AGC AGA CAA TGT AGC T /3InvdT/

**13. Negative control: Scrameble-miR M'**

5' *biotin* AAA AAA AAA AAA AAC AGG TTC AGA ATC CTC GAC AAA AAA – PC Linker  
– AAA AAA GTGTAACACGTCTATACGCCCA/3InvdT

**Table S2: Sequence of DNA barcodes immobilized on the glass slide**

A 5'- AAA AAA AAA AAA AAT CCT GGA GCT AAG TCC GTA-3'  
B 5'-AAA AAA AAA AAA AGC CTC ATT GAA TCA TGC CTA -3'  
C 5'- AAA AAA AAA AAA AGC ACT CGT CTA CTA TCG CTA -3'  
D 5'-AAA AAA AAA AAA AAT GGT CGA GAT GTC AGA GTA -3'  
E 5'-AAA AAA AAA AAA AAT GTG AAG TGG CAG TAT CTA -3'  
F 5'-AAA AAA AAA AAA AAT CAG GTA AGG TTC ACG GTA -3'  
G 5'-AAA AAA AAA AGA GTA GCC TTC CCG AGC ATT-3'  
H 5'-AAA AAA AAA AAT TGA CCA AAC TGC GGT GCG-3'  
I 5'-AAA AAA AAA ATG CCC TAT TGT TGC GTC GGA-3'  
J 5'-AAA AAA AAA ATC TTC TAG TTG TCG AGC AGG-3'  
K 5'-AAA AAA AAA ATA ATC TAA TTC TGG TCG CGG-3'  
L 5'-AAA AAA AAA AGT GAT TAA GTC TGC TTC GGC-3'  
M 5'-AAA AAA AAA AGT CGA GGA TTC TGA ACC TGT-3'
